# Supplementary material for: NT157 has antineoplastic effects and inhibits IRS1/2 and STAT3/5 in JAK2V617F-positive myeloproliferative neoplasm cells
Source: PubMed Central journal article supplement (PMC6978524; doi:10.1038/s41392-019-0102-5), 2020-01-24

Whole Western blot gels for review

HEL cells

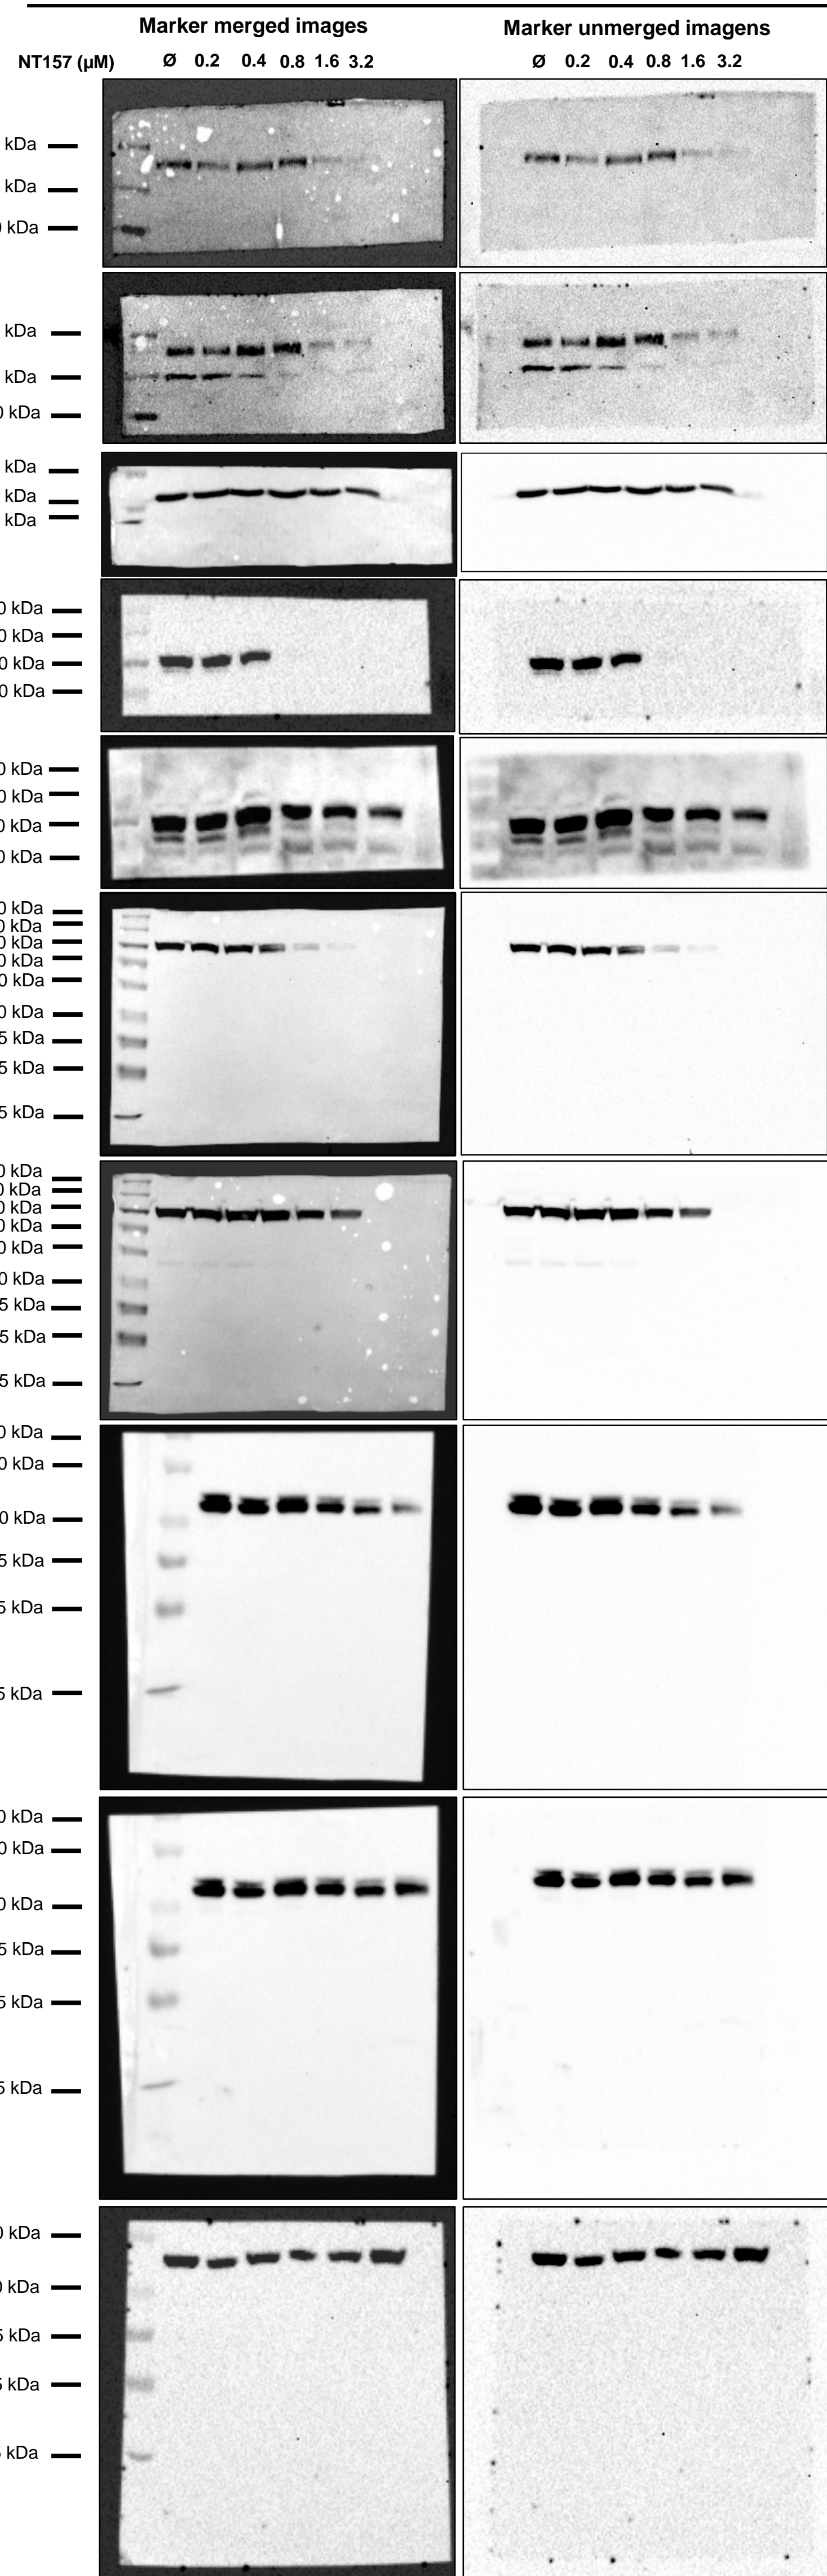

HEL cells

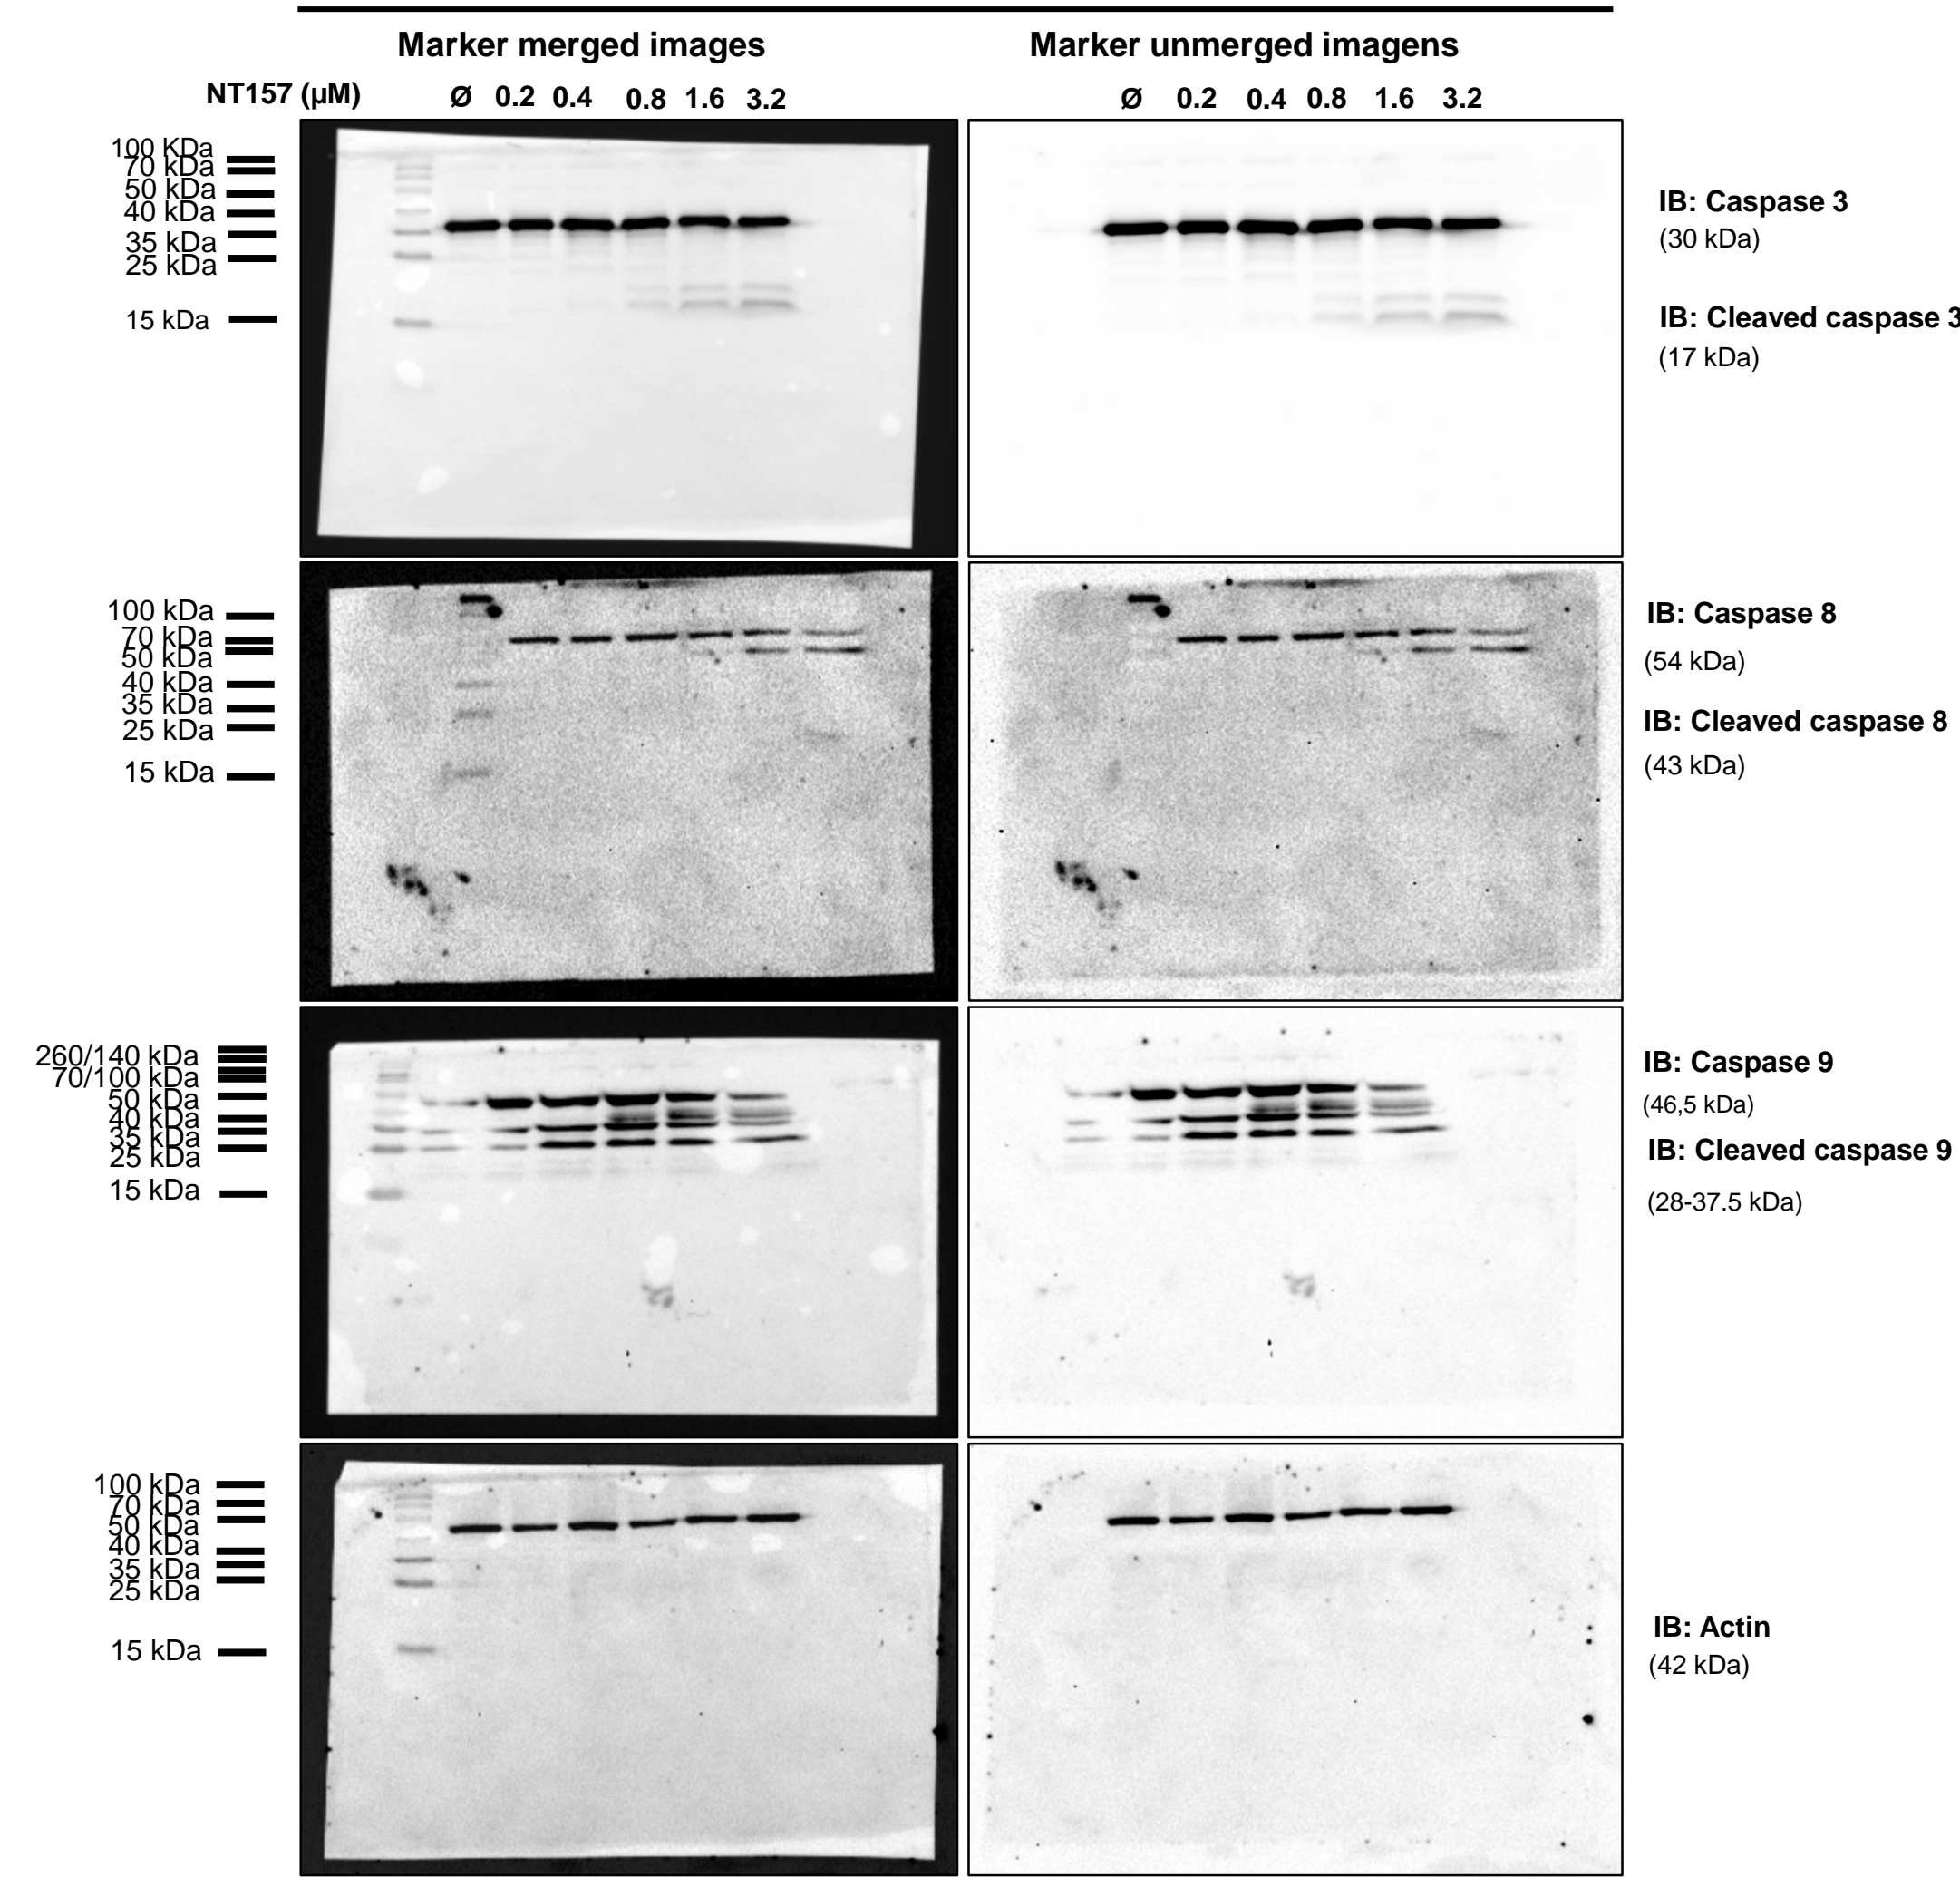

HEL cells

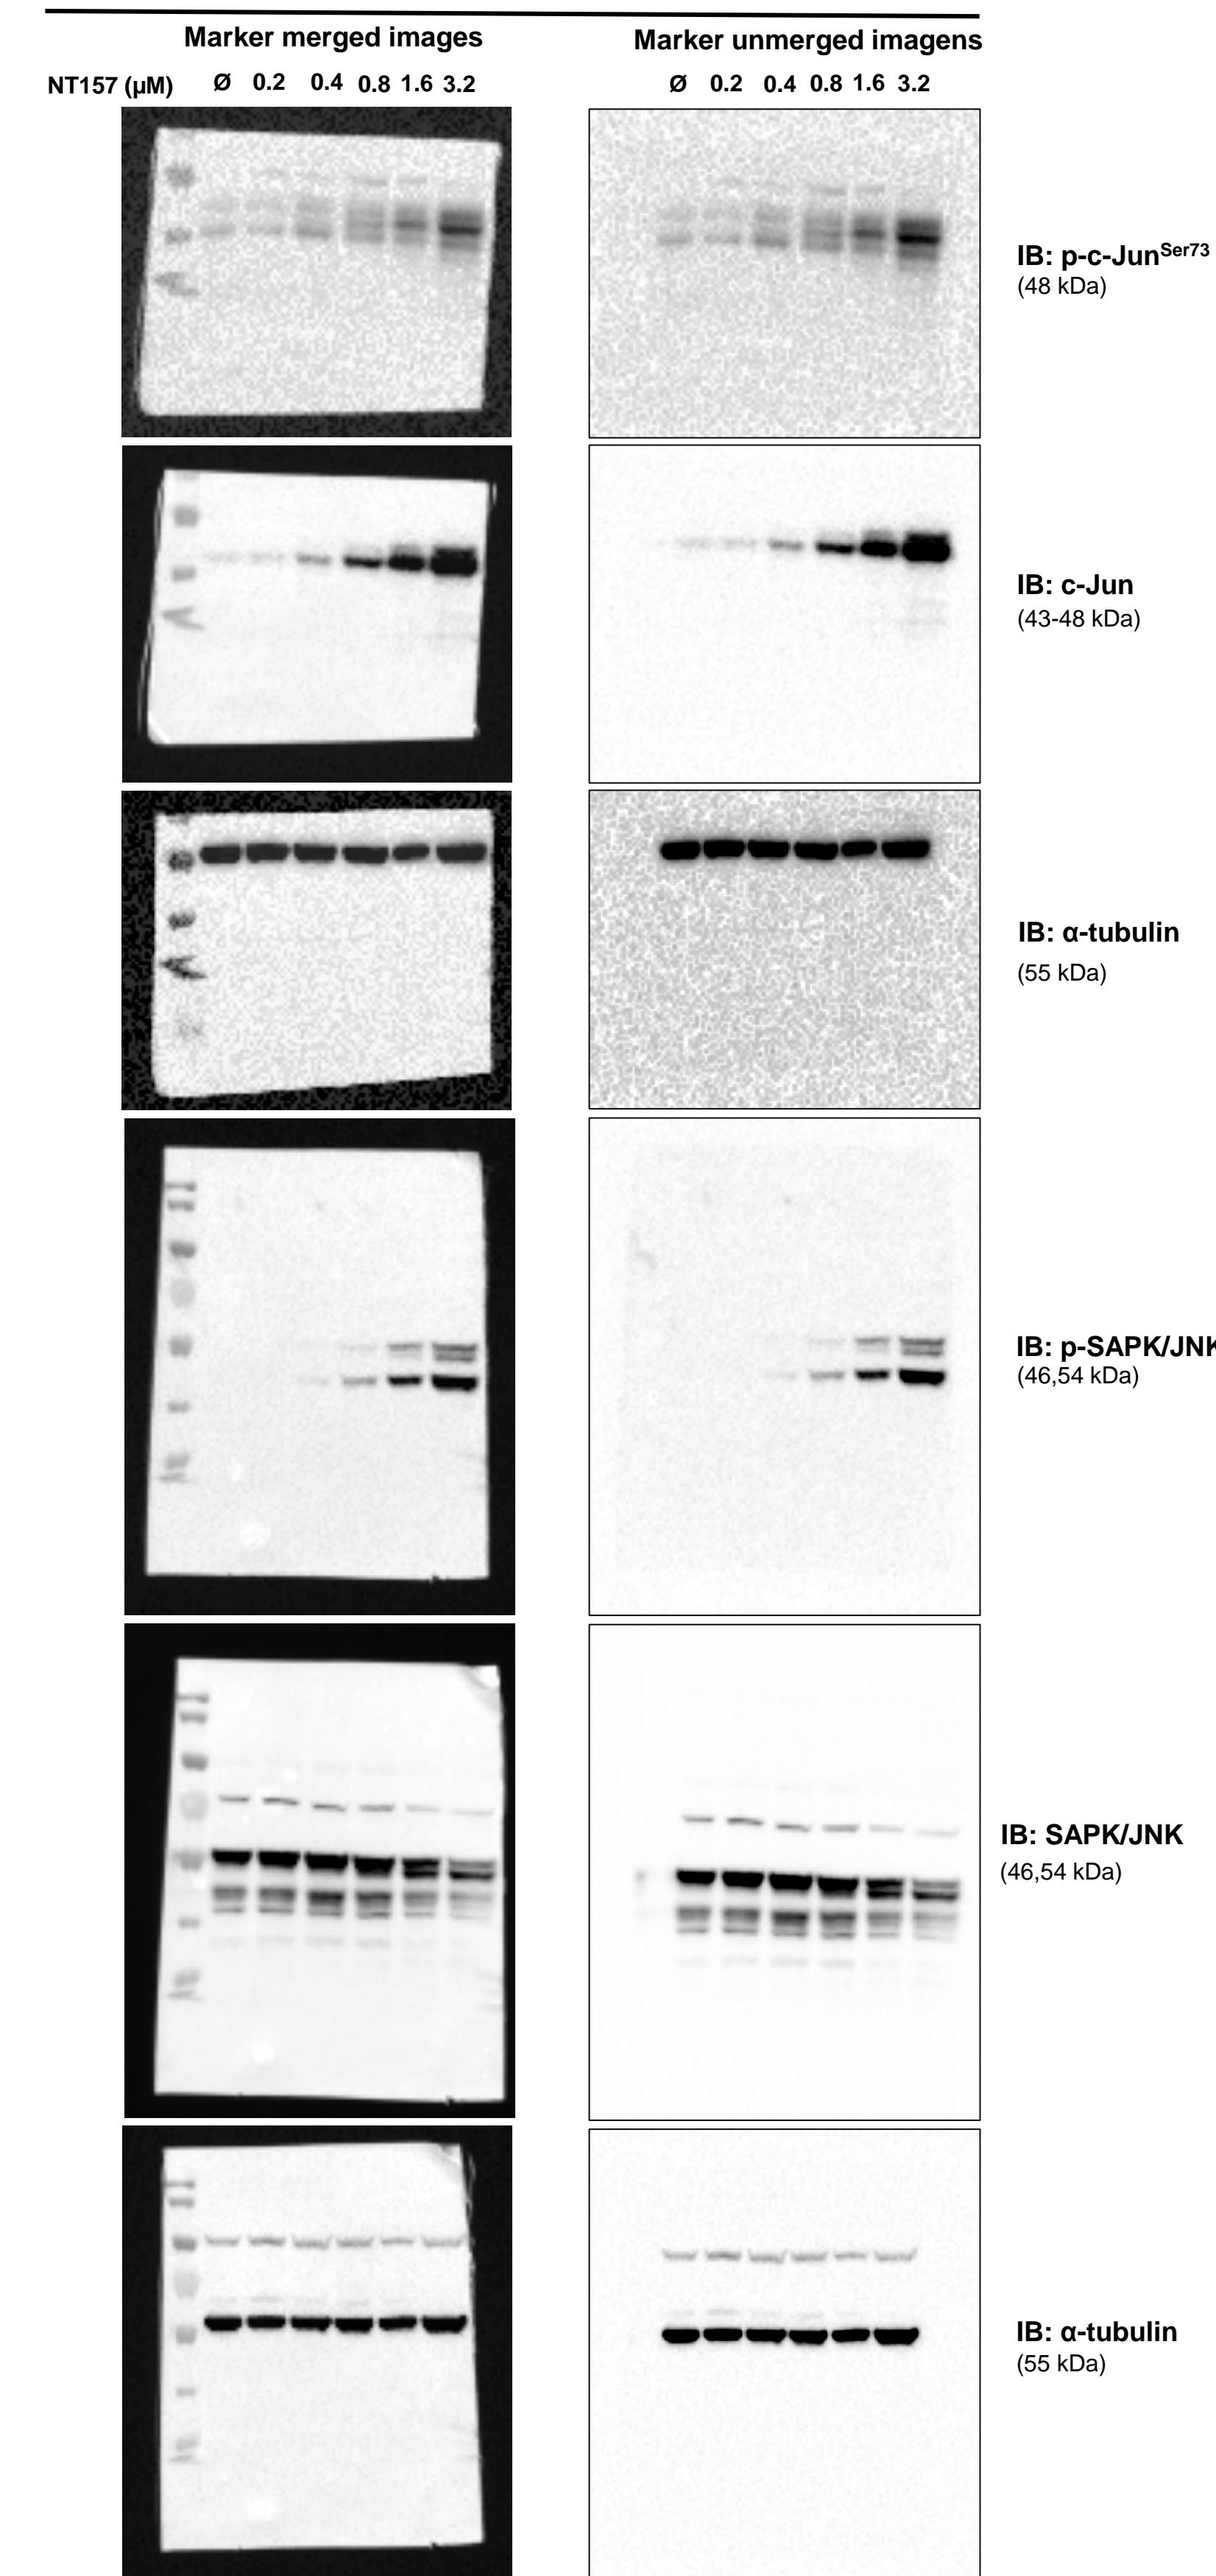

HEL cells

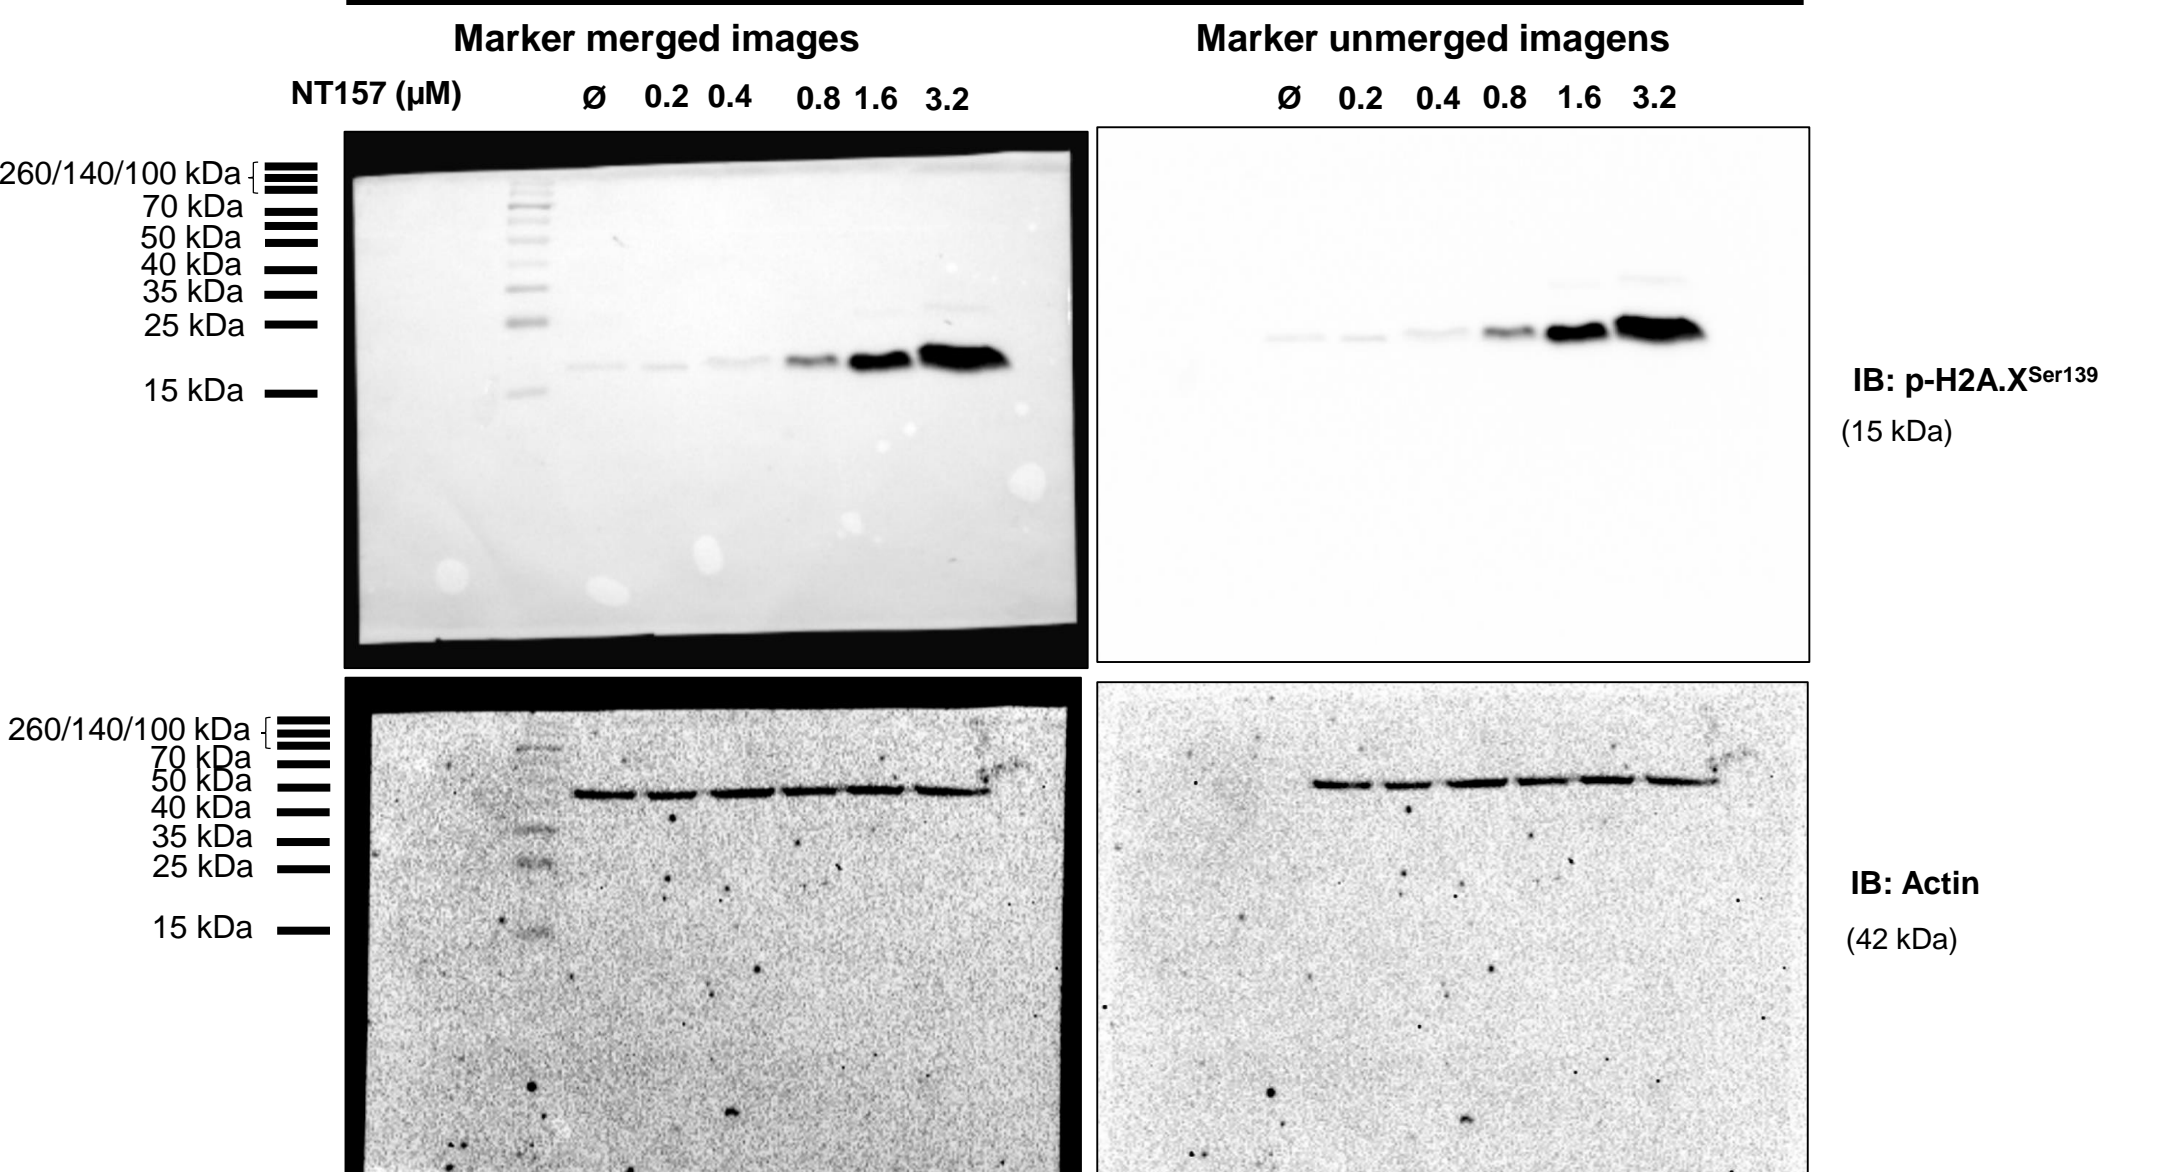

HEL cells

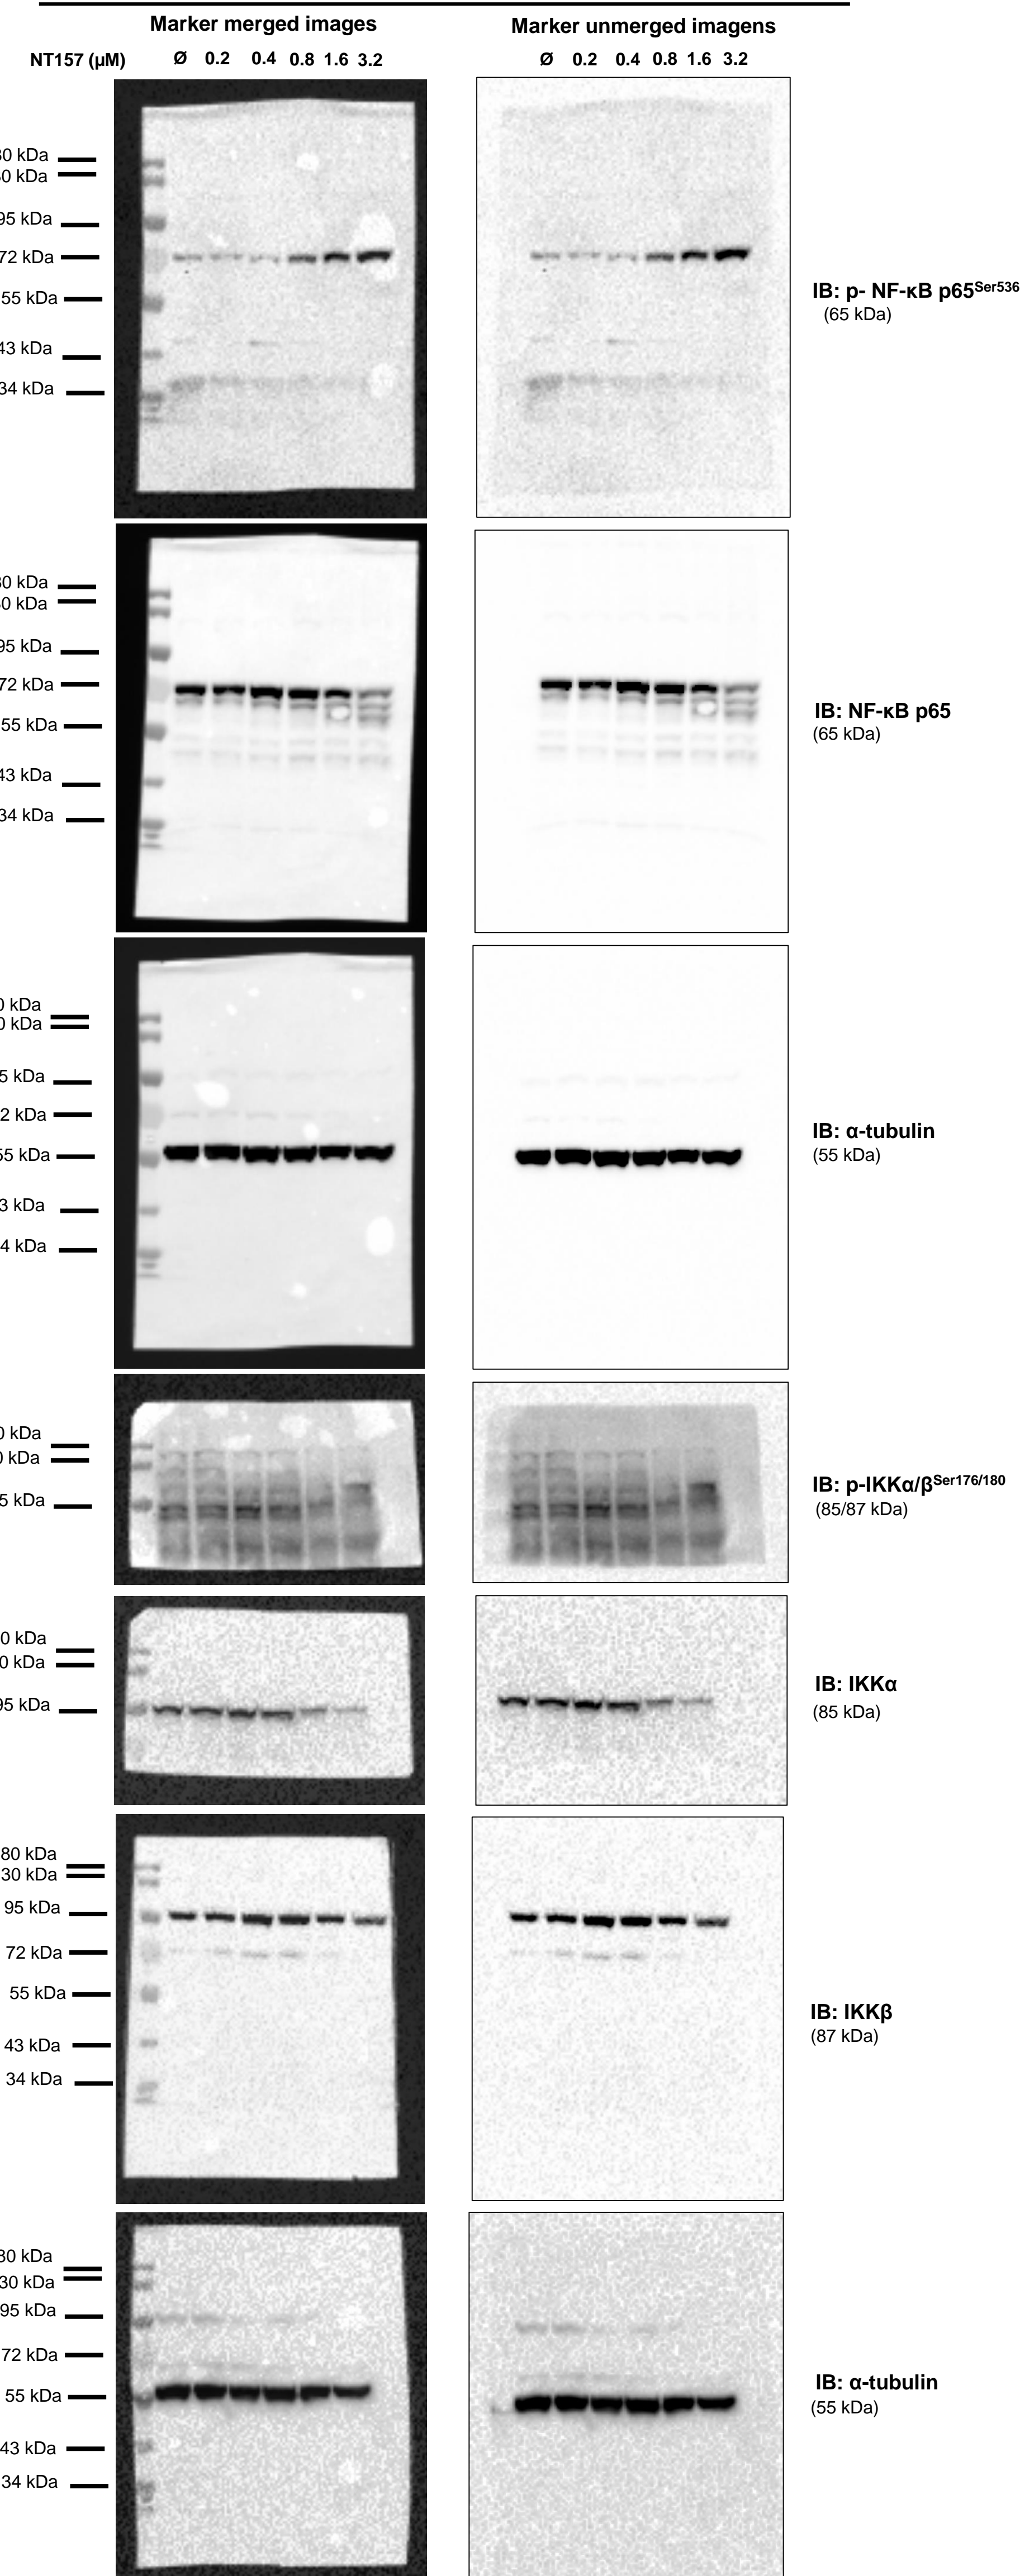

HEL cells

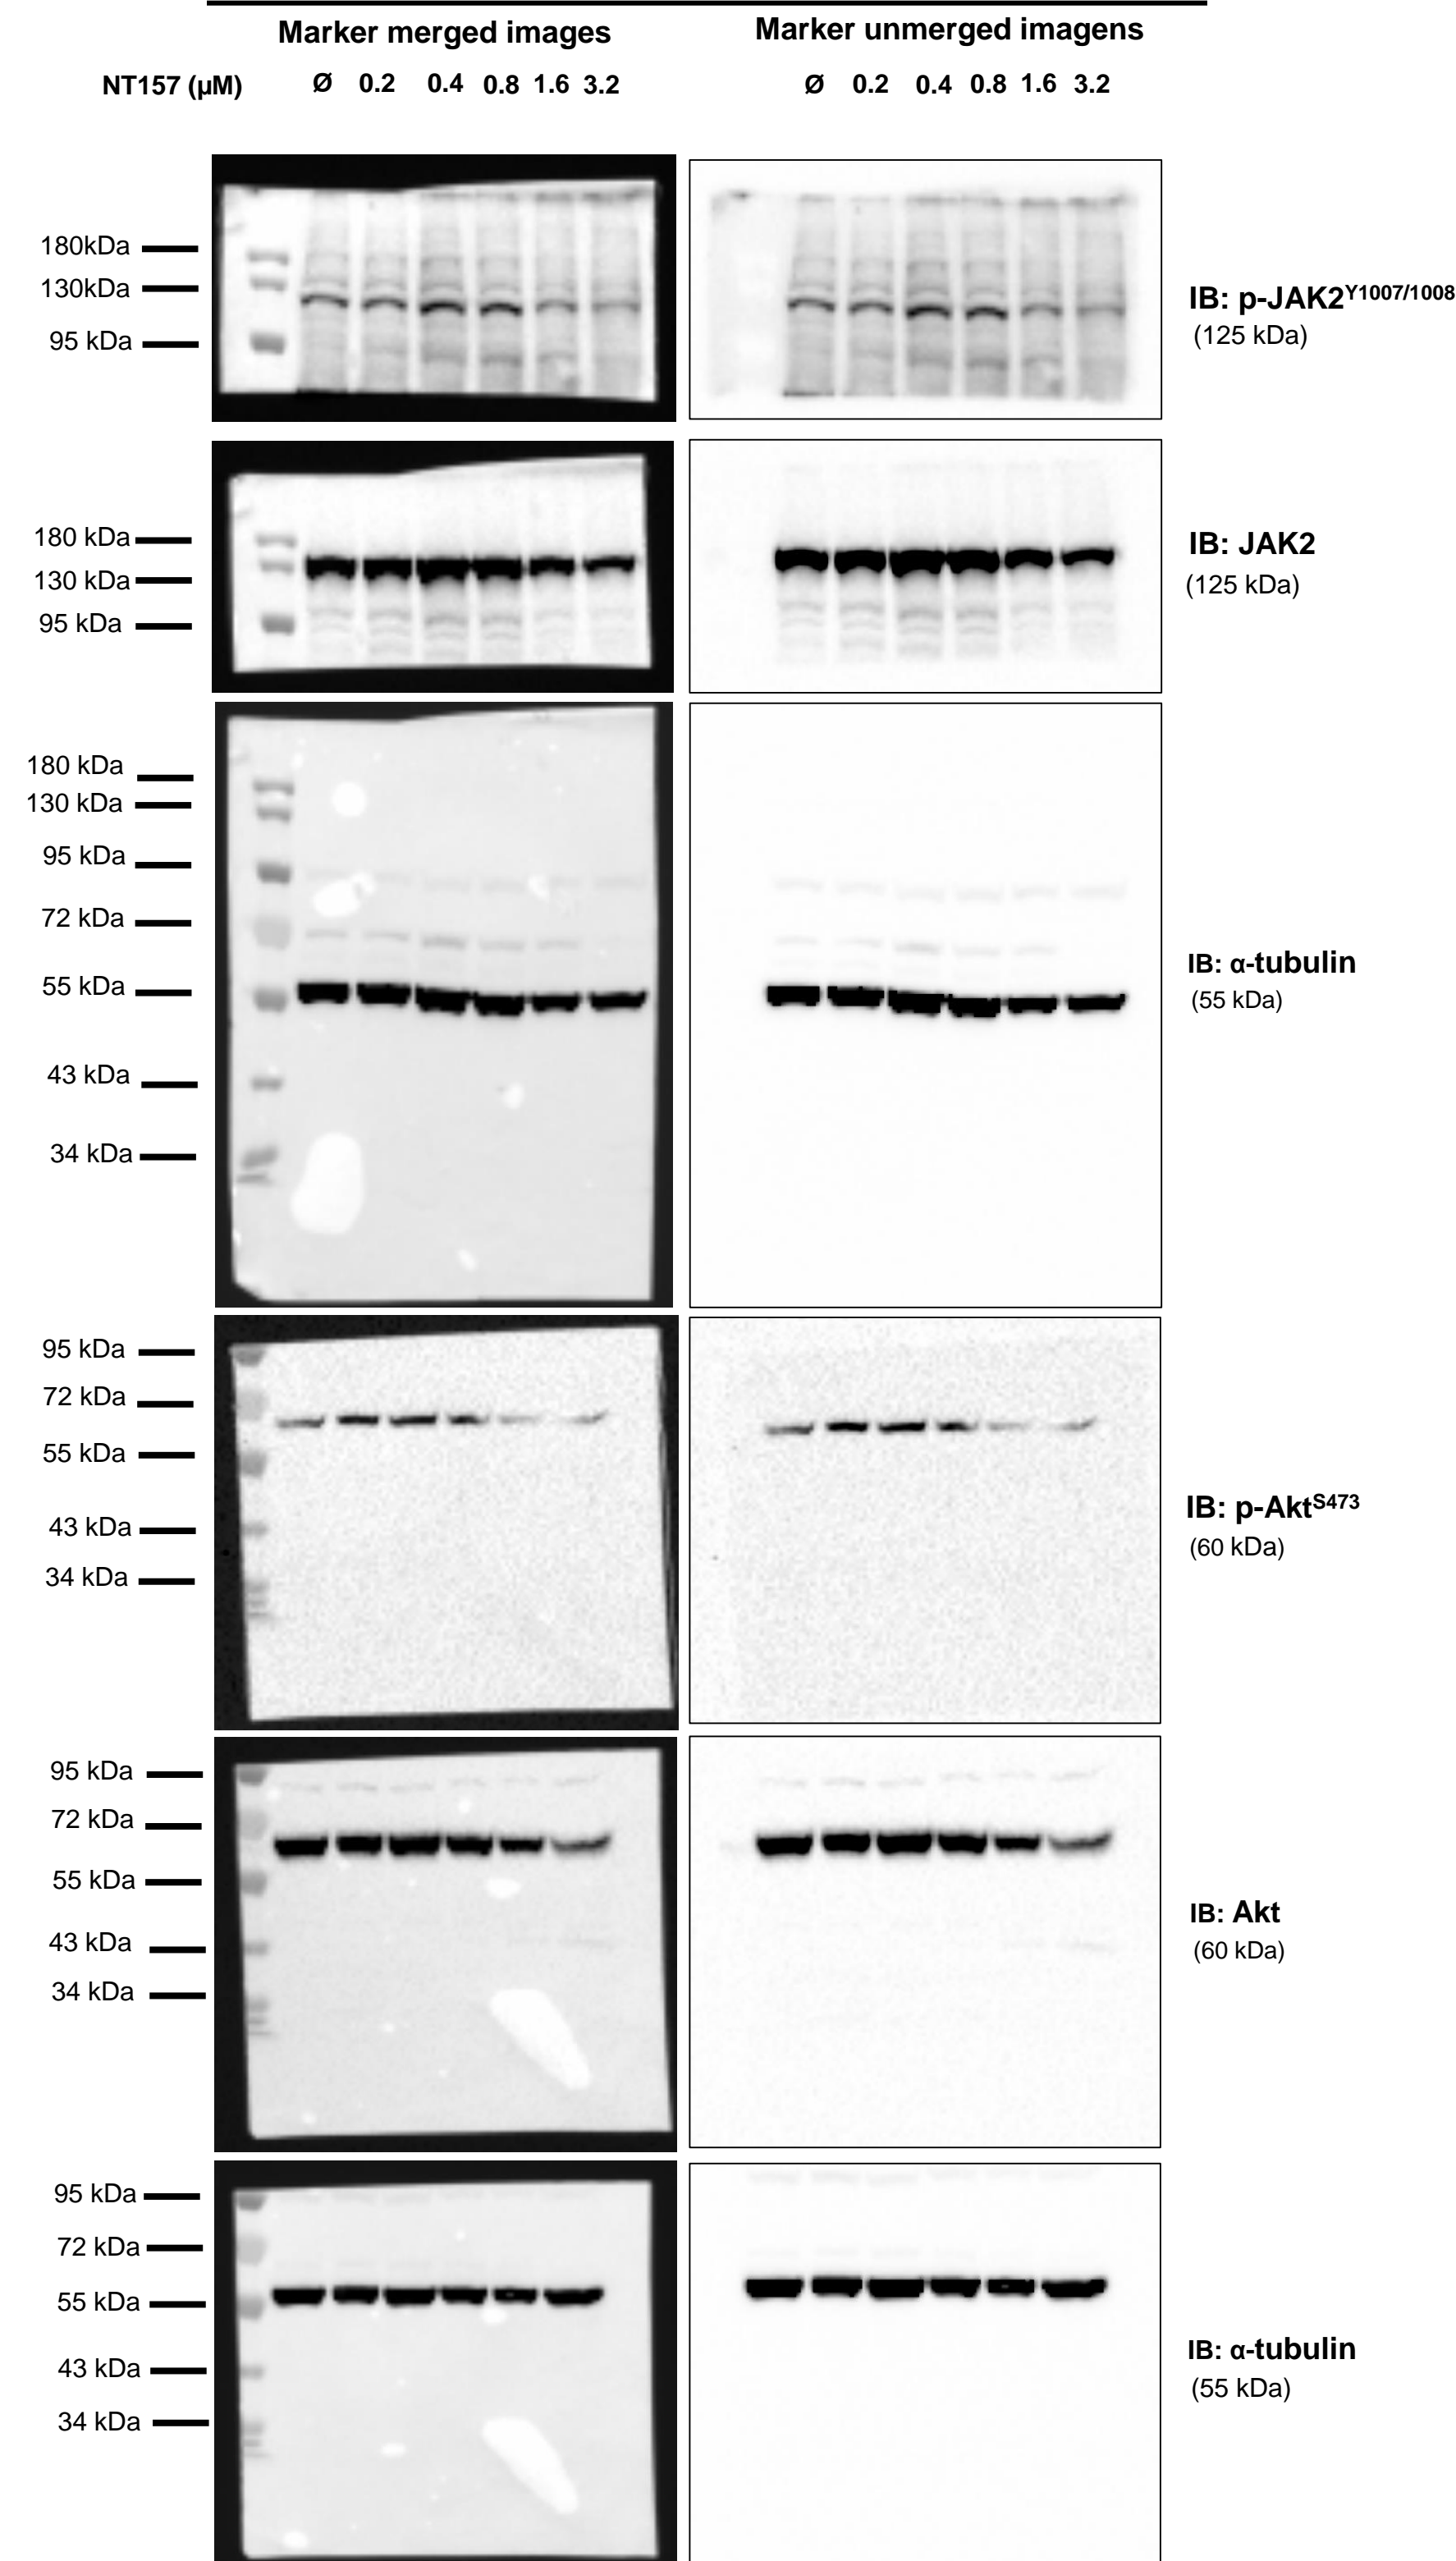

Supplement: 41392_2019_102_MOESM2_ESM.pdf [file 41392_2019_102_MOESM2_ESM.pdf]
